# Supplementary material for: Metabolism and biochemical properties of nicotinamide adenine dinucleotide (NAD) analogs, nicotinamide guanine dinucleotide (NGD) and nicotinamide hypoxanthine dinucleotide (NHD)
Source: PubMed Central journal article supplement (PMC6739475; doi:10.1038/s41598-019-49547-6), 2019-09-11
Supplement: 41598_2019_49547_MOESM1_ESM.pdf [file 41598_2019_49547_MOESM1_ESM.pdf]

## Supplementary Information file

### **Metabolism and biochemical properties of nicotinamide adenine dinucleotide (NAD) analogs, nicotinamide guanine dinucleotide (NGD) and nicotinamide hypoxanthine dinucleotide (NHD)**

Keisuke Yaku<sup>1</sup>, Keisuke Okabe<sup>1,2</sup>, Maryam Gulshan<sup>1</sup>, Kiyoshi Takatsu<sup>3,4</sup>, Hiroshi Okamoto<sup>5,6</sup>, Takashi Nakagawa<sup>1,7</sup>

<sup>1</sup>Department of Metabolism and Nutrition, Graduate School of Medicine and Pharmaceutical Science for Research, University of Toyama, Toyama 930-0194, Japan

<sup>2</sup>First Department of Internal Medicine, Graduate School of Medicine and Pharmaceutical Science for Research, University of Toyama, Toyama 930-0194, Japan

<sup>3</sup>Toyama Prefectural Institute for Pharmaceutical Research, Toyama 939-0363, Japan

<sup>4</sup>Department of Immunobiology and Pharmacological Genetics, Graduate School of Medicine and Pharmaceutical Science for Research, University of Toyama, Toyama 930-0194, Japan

<sup>5</sup>Department of Biochemistry, Tohoku University Graduate School of Medicine, Sendai 980-8575, Japan

<sup>6</sup>Department of Biochemistry and Molecular Vascular Biology, Kanazawa University Graduate School of Medical Sciences, Kanazawa 920-8640, Japan

<sup>7</sup>Institute of Natural Medicine, University of Toyama, Toyama 930-0194, Japan

# Supplementary Figure 1

**A**

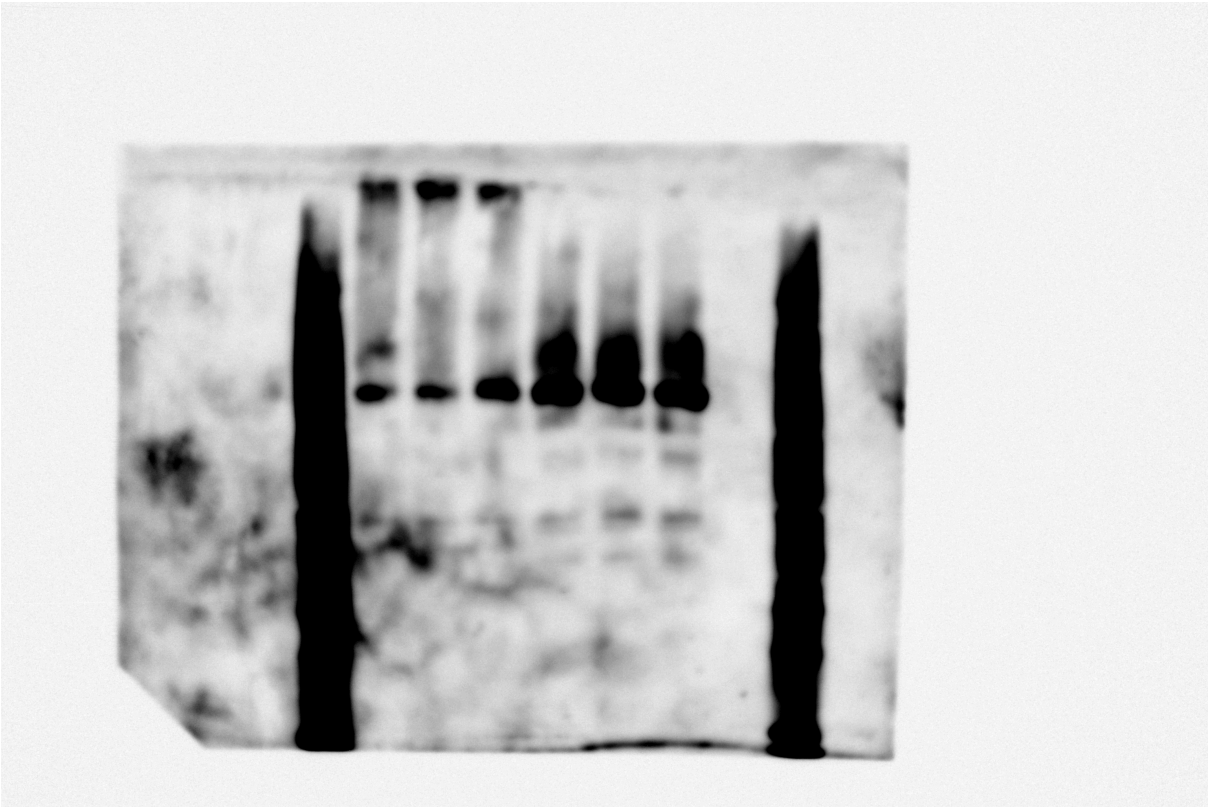

**B**

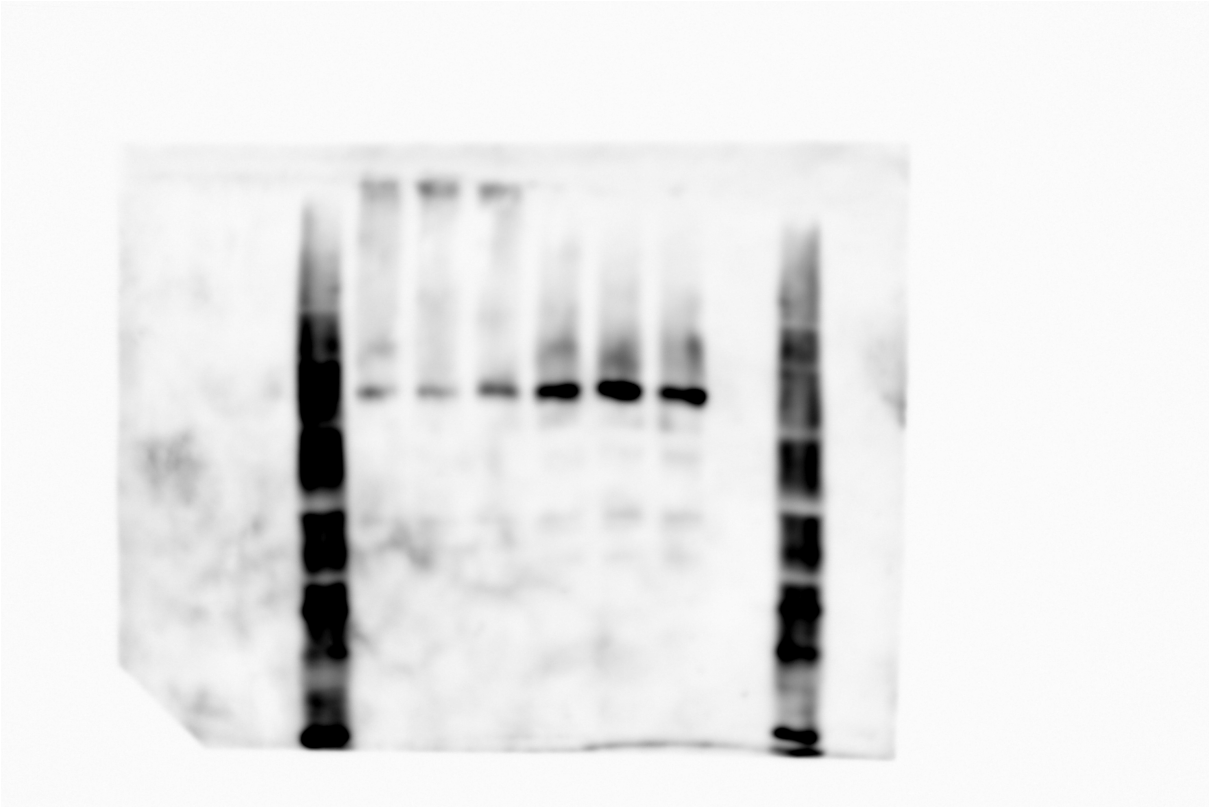

## **Supplementary Figure Legend**

### **Supplementary Figure 1.**

(A) Original gel image corresponded to Figure 5A. (B) Shorter exposure gel image corresponded to Figure 5A.
